# Supplementary material for: Determination of Activation Energy from Decolorization Reactions of Synthetic Dyes by Fenton Processes Using the Behnajady–Modirshahla–Ghanbary Kinetic Model
Source: MDPI journal article supplement (doi:10.3390/catal14040273), 2024-04-18
Supplement: s1 [file s1]

---

## Supplementary Materials

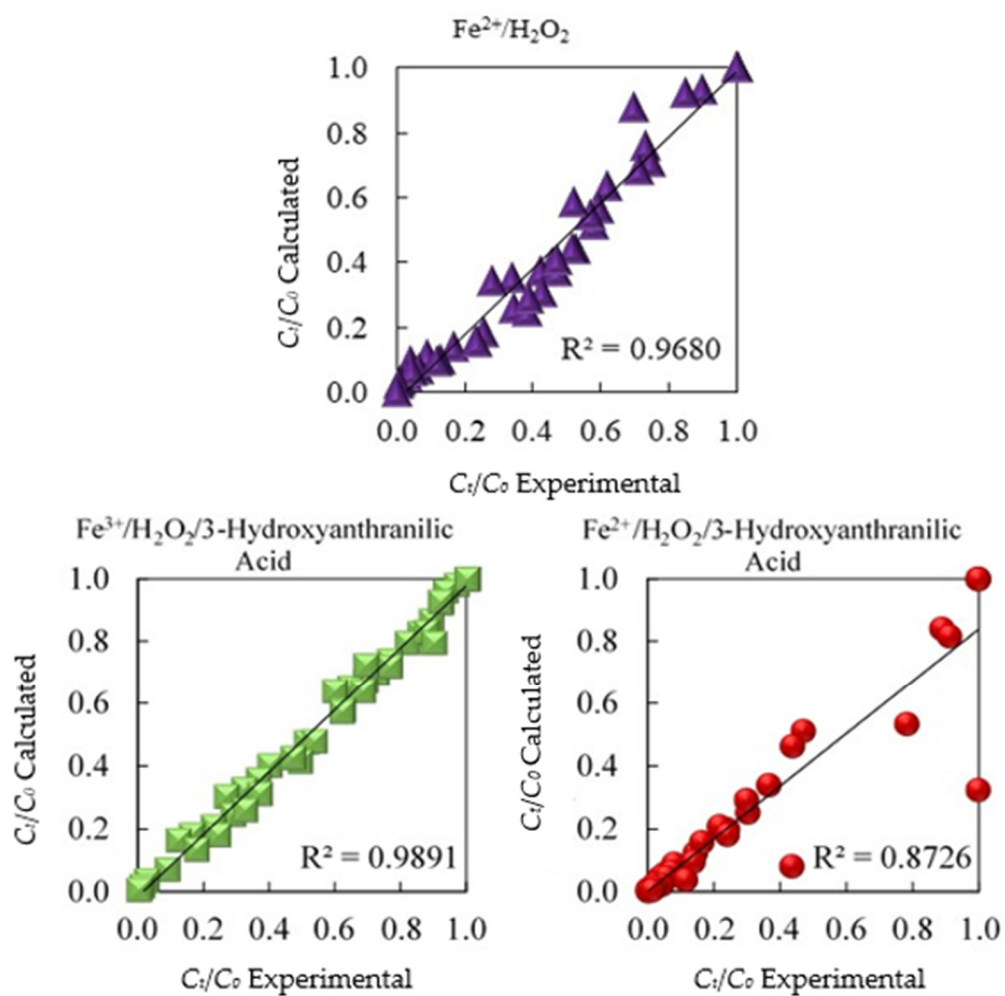

Figure S1. Parity plots of Phenol Red decolorization data by Fenton processes in the absence (control) or presence of 3-Hydroxyanthranilic Acid as reducer. Reaction systems:  $\text{Fe}^{2+}/\text{H}_2\text{O}_2$  ( $\blacktriangle$ ),  $\text{Fe}^{2+}/\text{H}_2\text{O}_2/\text{reducer}$  ( $\bullet$ ) and  $\text{Fe}^{3+}/\text{H}_2\text{O}_2/\text{reducer}$  ( $\blacksquare$ ).

---

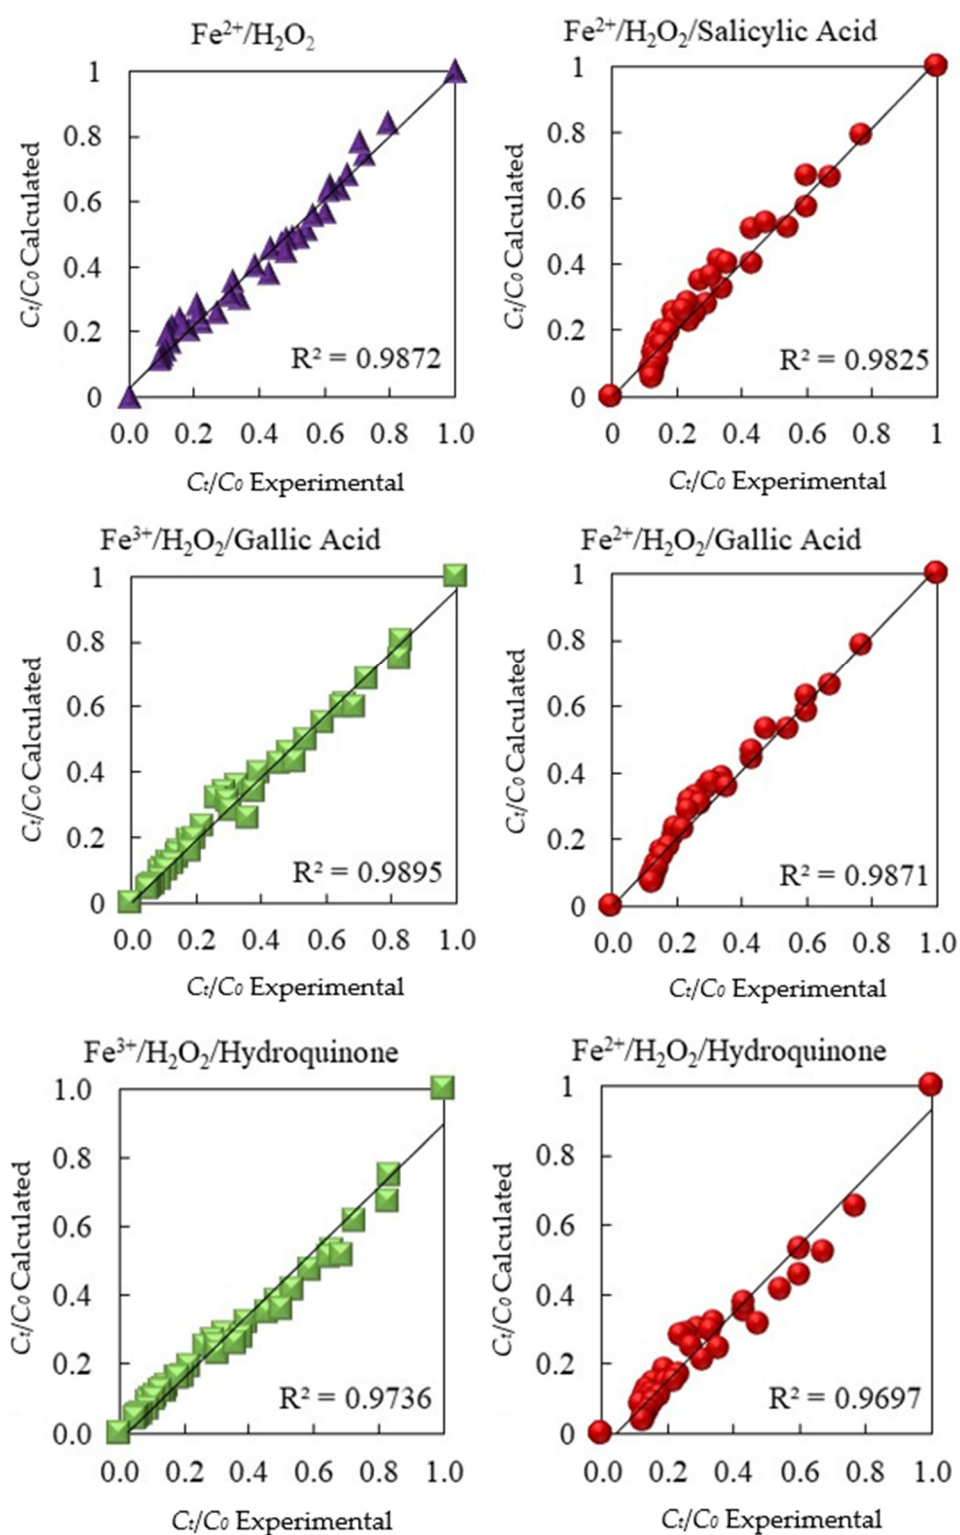

Figure S2. Parity plots of Bismarck Brown Y decolorization data by Fenton processes in the absence (control) or presence of Hydroquinone, Gallic Acid or Salicylic Acid. Reaction systems:  $\text{Fe}^{2+}/\text{H}_2\text{O}_2$  ( $\blacktriangle$ ),  $\text{Fe}^{2+}/\text{H}_2\text{O}_2/\text{reducer}$  ( $\bullet$ ) and  $\text{Fe}^{3+}/\text{H}_2\text{O}_2/\text{reducer}$  ( $\blacksquare$ ).

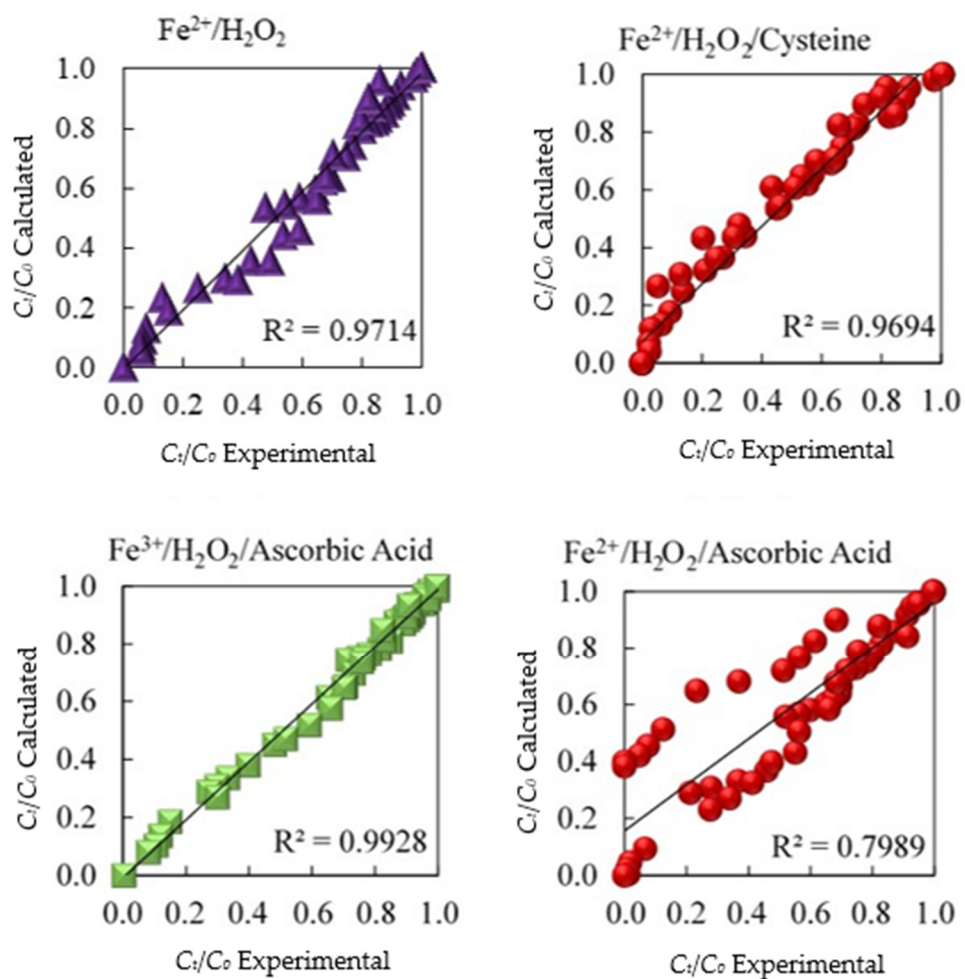

Figure S3. Parity plots of Safranin T decolorization data by Fenton processes in the absence (control) or presence of Cysteine or Ascorbic Acid as reducers. Reaction systems:  $\text{Fe}^{2+}/\text{H}_2\text{O}_2$  ( $\blacktriangle$ ),  $\text{Fe}^{2+}/\text{H}_2\text{O}_2/\text{reducer}$  ( $\bullet$ ) and  $\text{Fe}^{3+}/\text{H}_2\text{O}_2/\text{reducer}$  ( $\blacksquare$ ).

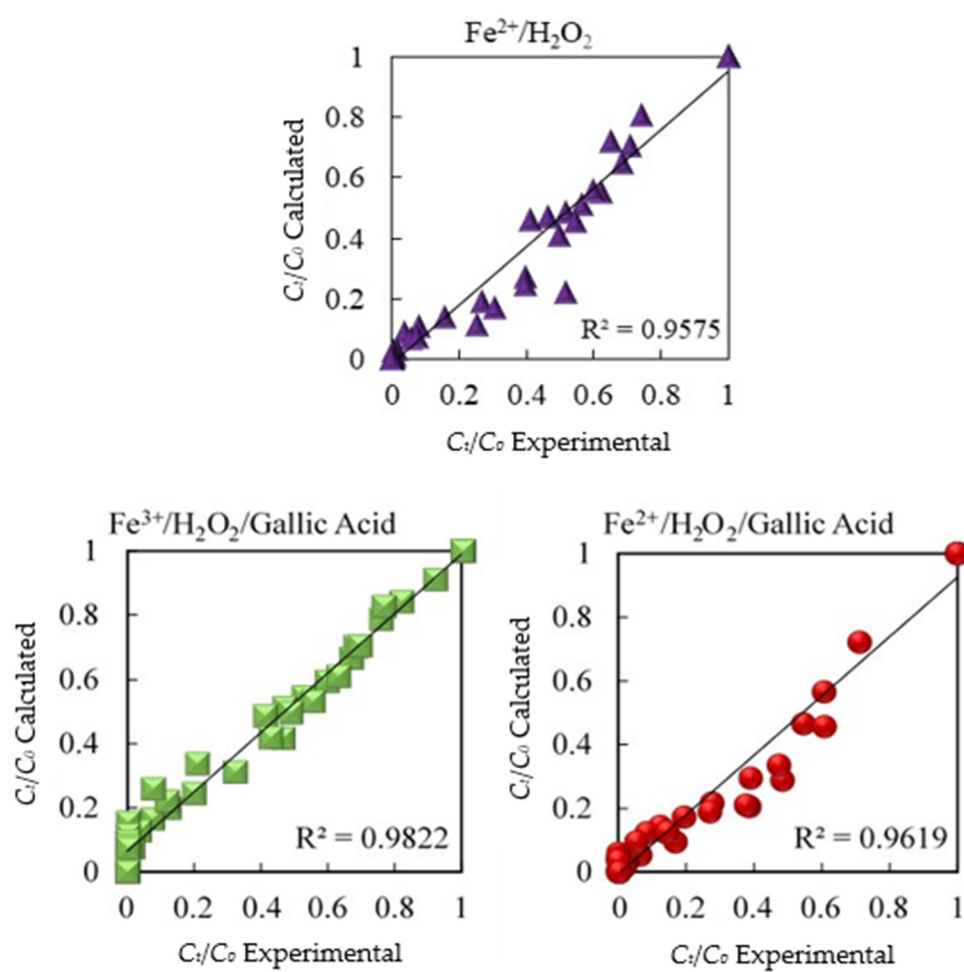

Figure S4. Parity plots of Methyl Orange decolorization data by Fenton processes in the absence (control) or presence of Gallic Acid as reducer. Reaction systems: Fe<sup>2+</sup>/H<sub>2</sub>O<sub>2</sub> (▲), Fe<sup>2+</sup>/H<sub>2</sub>O<sub>2</sub>/reducer (●) and Fe<sup>3+</sup>/H<sub>2</sub>O<sub>2</sub>/reducer (■).

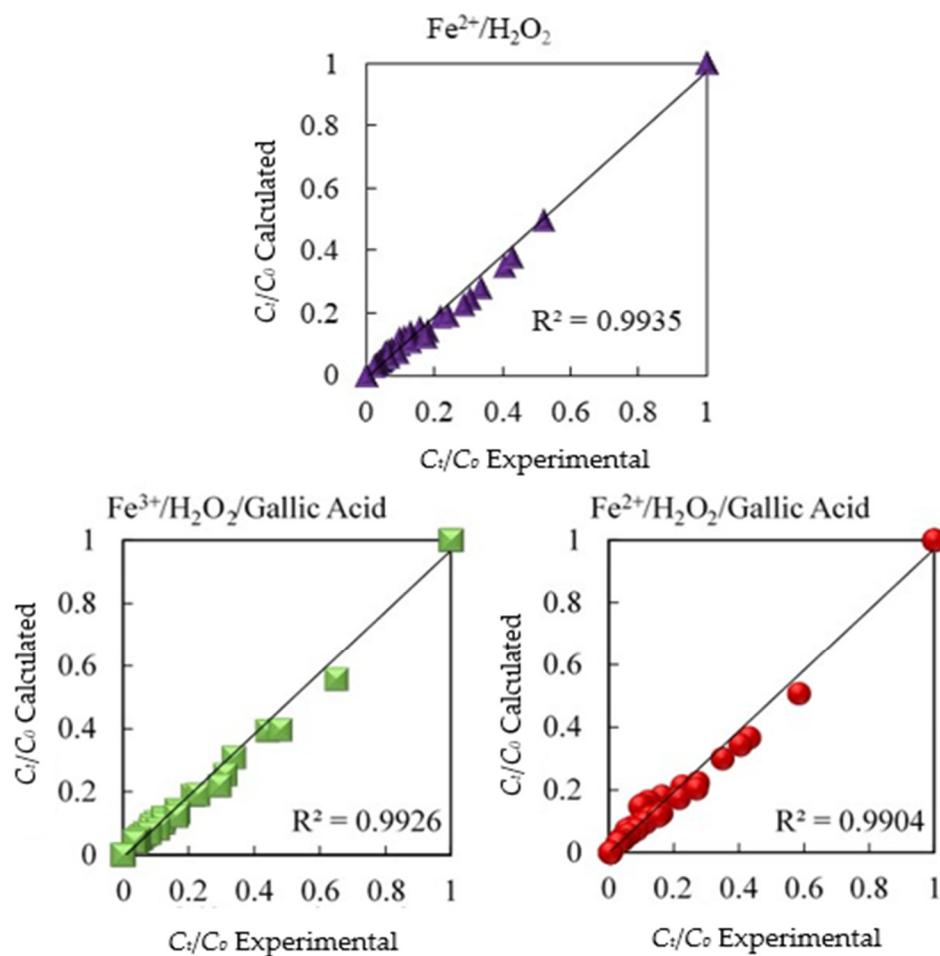

Figure S5. Parity plots of Chromotrope R decolorization data by Fenton processes in the absence (control) or presence of Gallic Acid as reducer. Reaction systems:  $\text{Fe}^{2+}/\text{H}_2\text{O}_2$  ( $\blacktriangle$ ),  $\text{Fe}^{2+}/\text{H}_2\text{O}_2/\text{reducer}$  ( $\bullet$ ) and  $\text{Fe}^{3+}/\text{H}_2\text{O}_2/\text{reducer}$  ( $\blacksquare$ ).

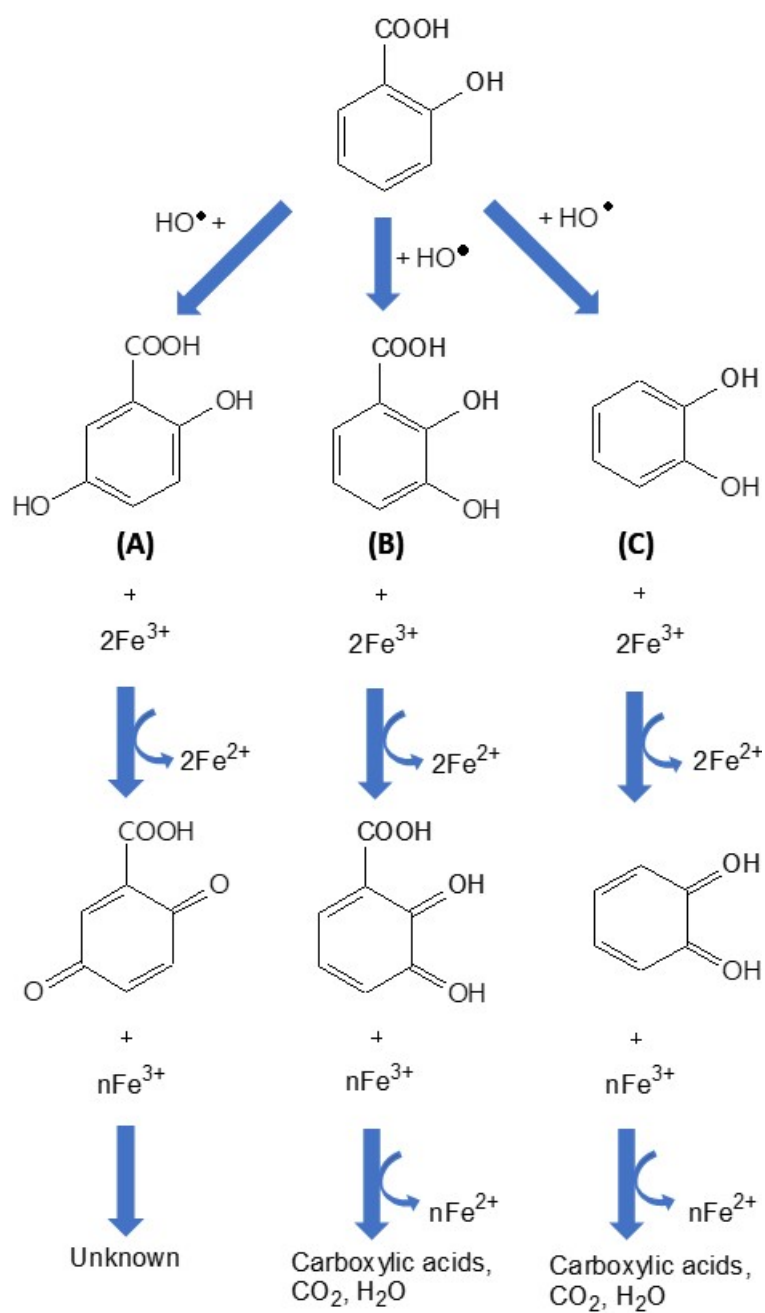

Figura S6.  $\text{Fe}^{3+}$ -reducing intermediates formed from Salicylic Acid hydroxylation [1]. (A) 2,5-dihydroxybenzoic acid, (B) 2,3-dihydroxybenzoic acid, (C) catechol; reactions between  $\text{Fe}^{3+}$  ions, intermediates and products of its oxidation (quinones, carboxylic acids,  $\text{CO}_2$ ,  $\text{H}_2\text{O}$ ). Adapted from [2].

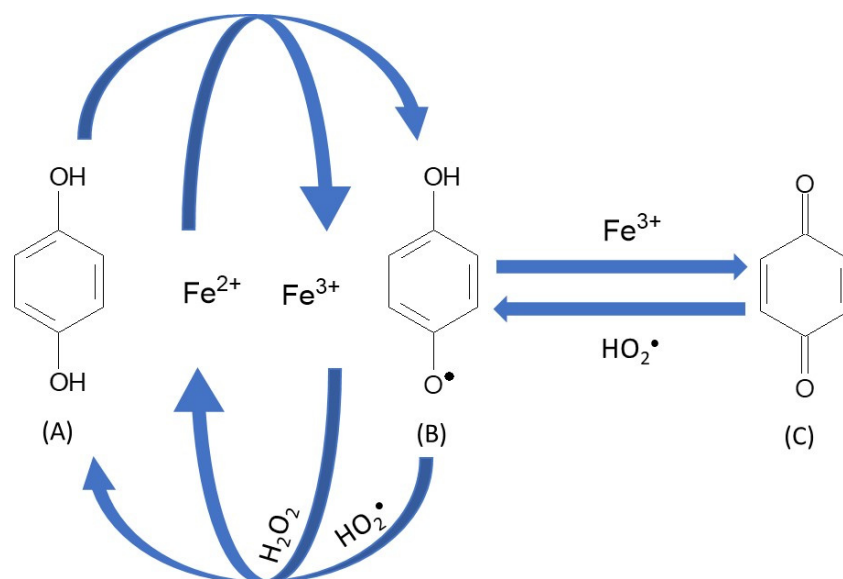

Figure S7. Reactions between Fe ions,  $\text{HO}_2^\bullet$  radical, Hydroquinone, and its intermediates (reproduced from [3]; license number 5742010257041).

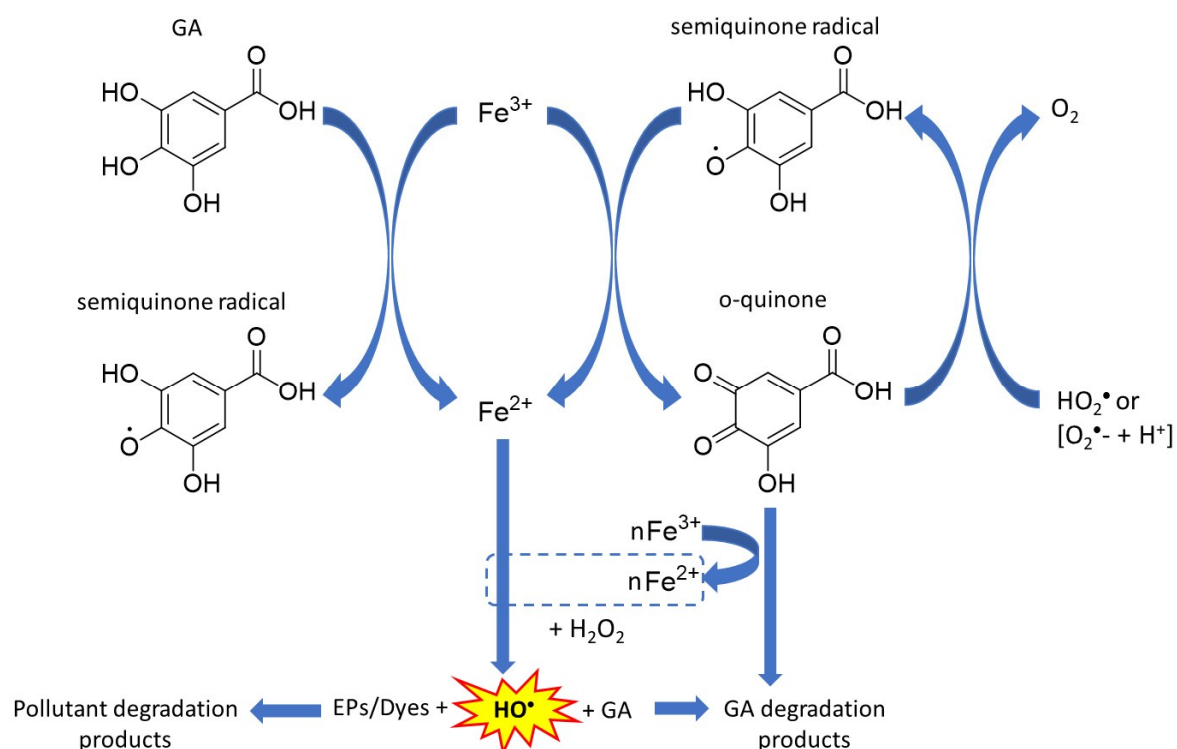

**Figure S8.** Reduction of  $\text{Fe}^{3+}$  ions by Gallic Acid (GA) and its oxidized intermediates. The regenerated  $\text{Fe}^{2+}$  ions can react with  $\text{H}_2\text{O}_2$  to generate more  $\text{HO}^\bullet$  radicals *via* Fenton reaction. Reproduced from [4]; this article is an open access article distributed under the terms and conditions of the Creative Commons Attribution (CC BY) license (<https://creativecommons.org/licenses/by/4.0/>).

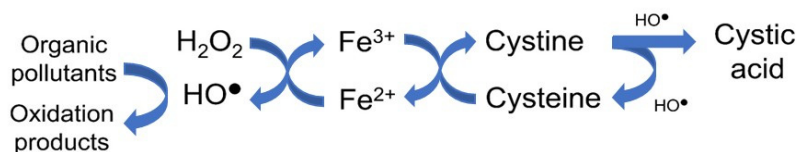

Figure S9. Reactions between Fenton reagents (Fe ions,  $\text{H}_2\text{O}_2$ ), Cysteine, and their intermediates (Cystine, Cystic acid),  $\text{HO}^\bullet$  radical, and organic pollutants eventually present in the solution (reproduced from [3]; license number 5742010257041).

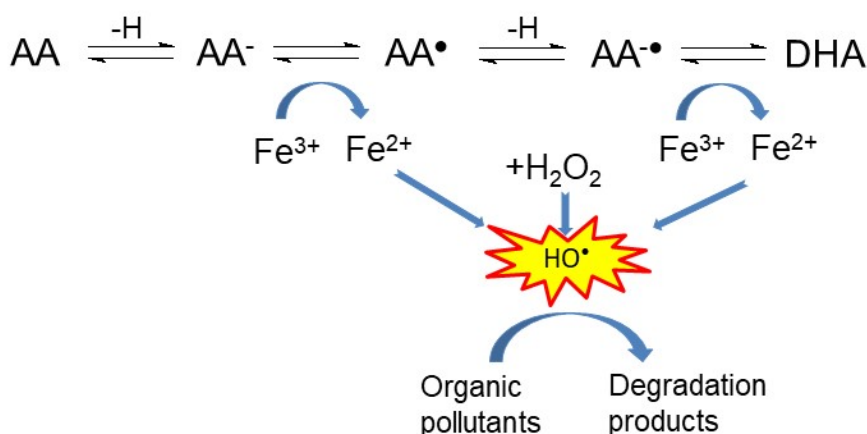

Figure S10 - Reactions between Fenton reagents (Fe ions,  $\text{H}_2\text{O}_2$ ), Ascorbic Acid (AA), and their intermediates ( $\text{AA}^-$ —ascorbate monoanion;  $\text{AA}^\bullet$ —semidehydroascorbate radical;  $\text{AA}^{\bullet\bullet}$ —Ascorbyl radical; DHA—dehydroascorbic acid),  $\text{HO}^\bullet$  radical, and degradation of organic pollutants eventually present in the solution (reproduced from [5]; license number 5742010679697).

## References

- Chen, F.; Ma, W.; He, J.; Zhao, J. Fenton degradation of malachite green catalyzed by aromatic additives. *J. Phys. Chem. A* **2002**, *106*, 9485–9490.
- Sousa, J.L.; Aguiar, A. Influence of aromatic additives on Bismarck Brown Y dye color removal treatment by Fenton processes. *Environ. Sci. Pollut. Res.* **2017**, *24*, 26734–26743.
- Li, T.; Zhao, Z.; Wang, Q.; Xie, P.; Ma, J. Strongly enhanced Fenton degradation of organic pollutants by cysteine: an aliphatic amino acid accelerator outweighs hydroquinone analogues. *Water Res.* **2016**, *105*, 479–486.
- Lima, J.P.P.; Tabelini, C.H.B.; Aguiar, A. A Review of gallic acid-mediated Fenton processes for degrading emerging pollutants and dyes. *Molecules* **2023**, *28*, 1166.
- Ramos, M.D.N.; Silva, G.L.S.; Lessa, T.L.; Aguiar, A. Study of kinetic parameters related to dyes oxidation in ascorbic acid-mediated Fenton processes. *Process Saf. Environ. Prot.* **2022**, *168*, 1131–111.

**Disclaimer/Publisher's Note:** The statements, opinions and data contained in all publications are solely those of the individual author(s) and contributor(s) and not of MDPI and/or the editor(s). MDPI and/or the editor(s) disclaim responsibility for any injury to people or property resulting from any ideas, methods, instructions or products referred to in the content.
